# Supplementary material for: Understanding Dengue Virus Capsid Protein Interaction with Key Biological Targets
Source: PubMed Central journal article supplement (PMC4498383; doi:10.1038/srep10592), 2015-07-10
Supplement: srep10592-s1.pdf [file srep10592-s1.pdf]

## Supplementary Information

### Title

Understanding Dengue Virus Capsid Protein Interaction with Key Biological Targets

### Authors

André F. Faustino<sup>1#</sup>, Ivo C. Martins<sup>1#\*</sup>, Filomena A. Carvalho<sup>1</sup>, Miguel A. R. B. Castanho<sup>1</sup>, Sebastian Maurer-Stroh<sup>2, 3</sup>, Nuno C. Santos<sup>1\*</sup>

### Affiliations

<sup>1</sup> – Instituto de Medicina Molecular, Faculdade de Medicina, Universidade de Lisboa, Lisbon, Portugal.

<sup>2</sup> – Bioinformatics Institute (BII), Agency for Science, Technology and Research (A\*STAR), Singapore.

<sup>3</sup> – School of Biological Sciences (SBS), Nanyang Technological University (NTU), Singapore.

# – These authors contributed equally to the work.

\* – Corresponding authors

Nuno C. Santos – nsantos@fm.ul.pt

Ivo C. Martins – ivomartins@fm.ul.pt

## A DENV C

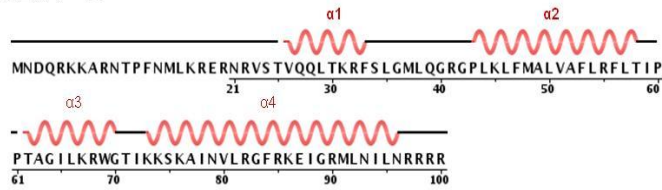

## B hAPOE

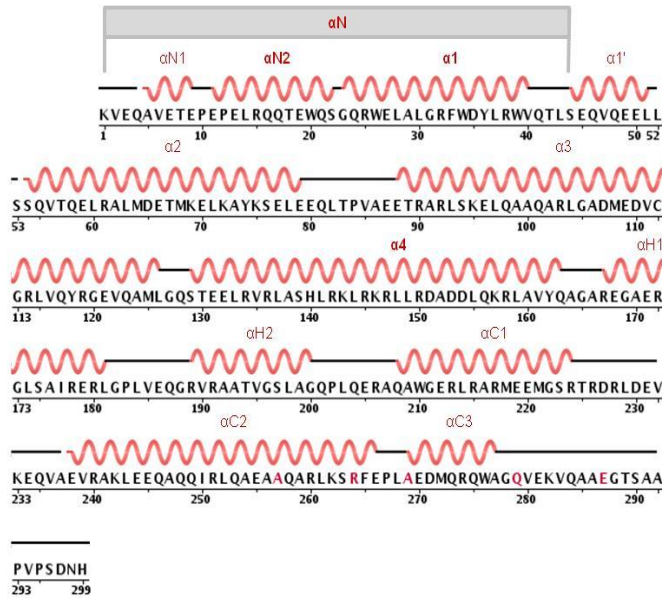

## C mPLIN3

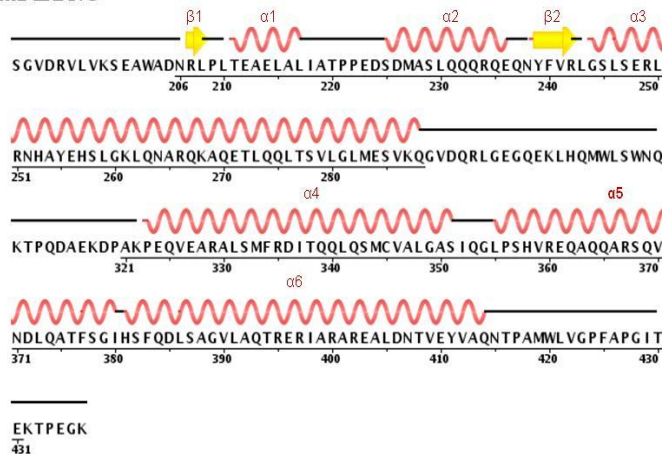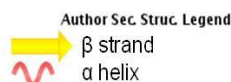

**Supplementary Figure S1 | DENV C, hAPOE and mPLIN3 secondary structure nomenclature.** Nomenclature of the secondary structure domains of (A) DENV C, (B) hAPOE and (C) mPLIN3 proteins, according to the secondary structure author assignment of the respective 1R6R, 2L7B and 1SZI PDB files. In (B), the segment hAPOEaN described in the manuscript, composed by the N-terminal hAPOE residues 1 to 44, is identified by the gray box.
